# Supplementary material
Source: Springer Nature journal article supplement (https://www.springermedizin.de/resource/supplementary/12935_2009_272_MOESM2_ESM.pdf/9540202)

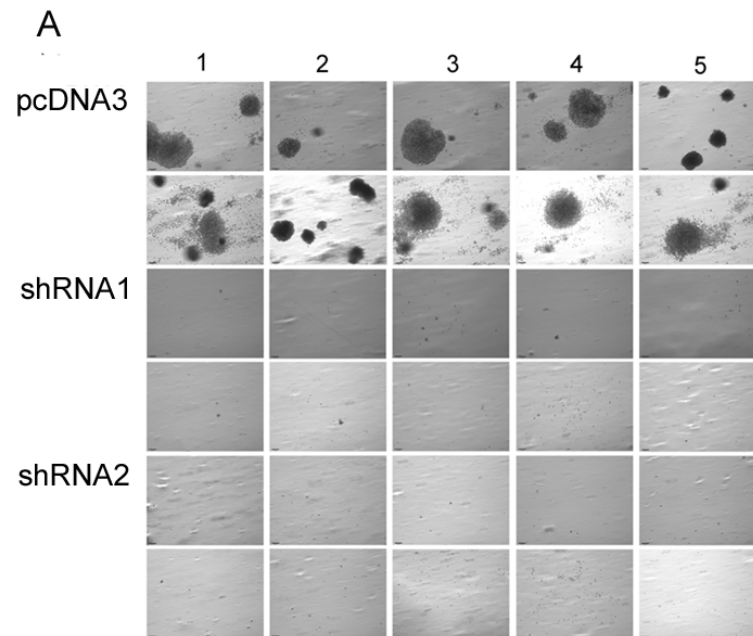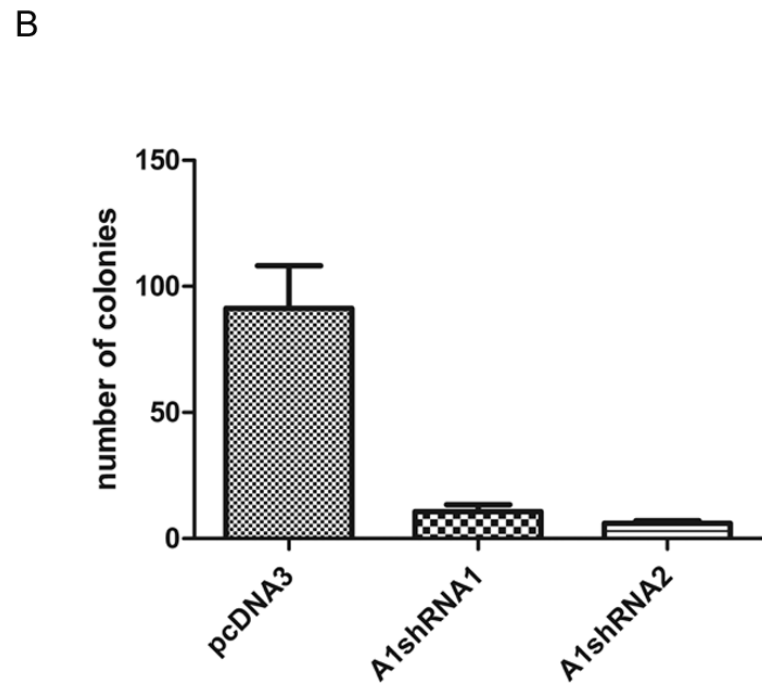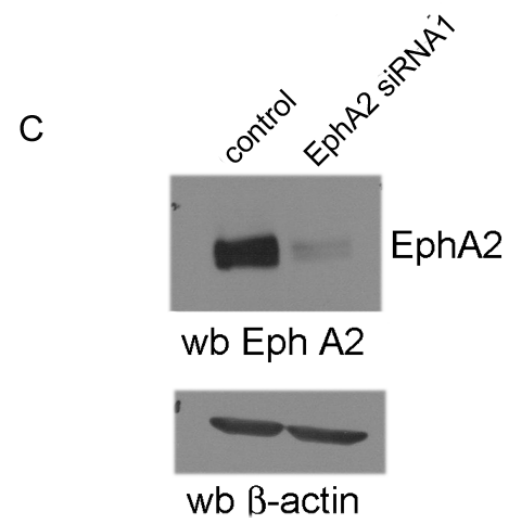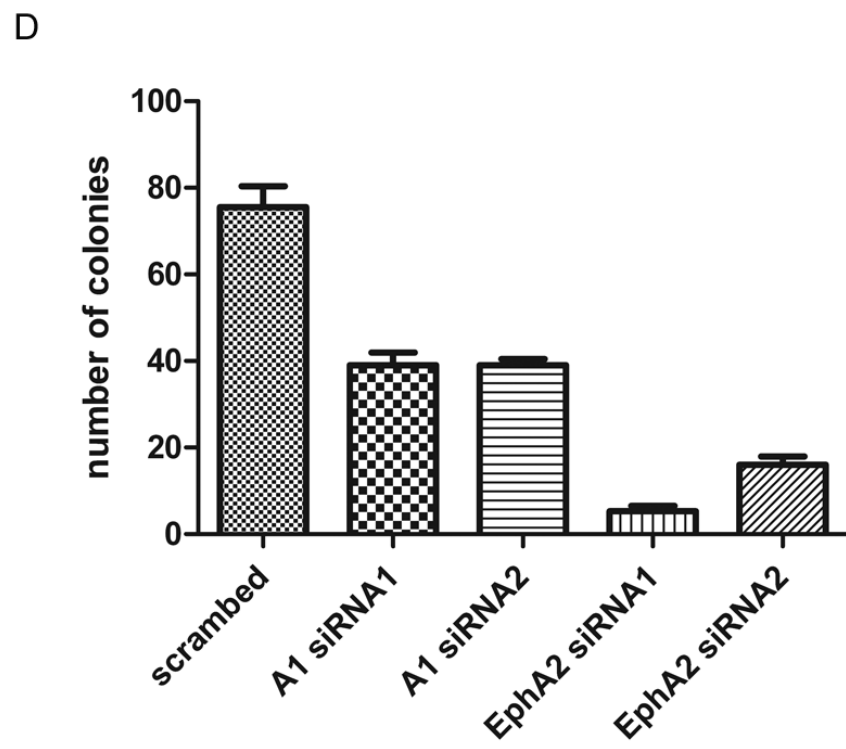

Supplement: MOESM2 [file 9540202]
